# Supplementary material for: Syntheses, crystal structures and properties of transition metal coordination polymers based on isophthalic acid and flexible bis(pyridyl) ligand with unsymmetrical spacer: influence of metal cations, ligand conformations and coordination modes
Source: Royal Society of Chemistry journal article supplement (doi:10.1039/c2ce25339a), 2012-01-01
Supplement: c2ce25339a.pdf [file c2ce25339a.pdf]

Electronic Supplementary Information for CrystEngComm

This journal is (c) The Royal Society of Chemistry 2012

Electronic Supplementary Information (ESI)

**Syntheses, crystal structures and properties of transition metal coordination polymers based on isophthalic acid and flexible bis(pyridyl) ligand with unsymmetrical spacer: influence of metal cations, ligand conformations and coordination modes†**

Zhao-Peng Deng, Zhu-Yan Zhang, Li-Hua Huo,<sup>\*</sup> Seik Weng Ng, Hui Zhao and Shan Gao<sup>\*</sup>

Electronic Supplementary Information for CrystEngComm

This journal is (c) The Royal Society of Chemistry 2012

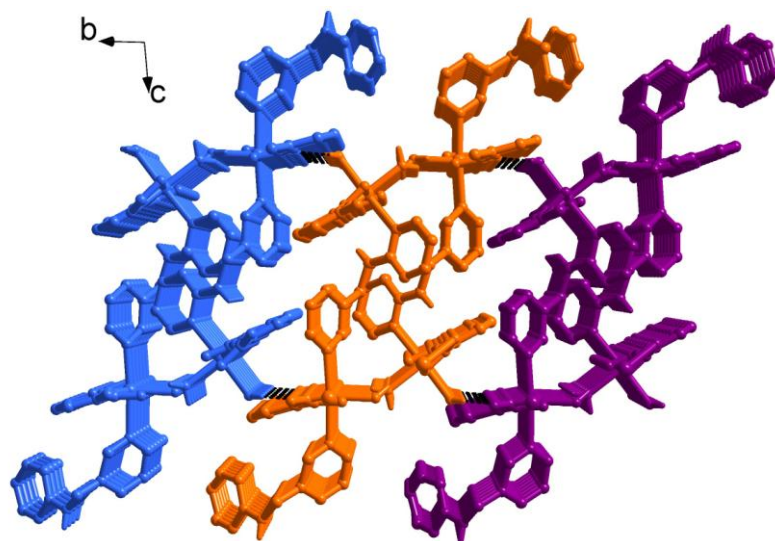

**Fig. S1** 3-D hydrogen-bonding supramolecular network.

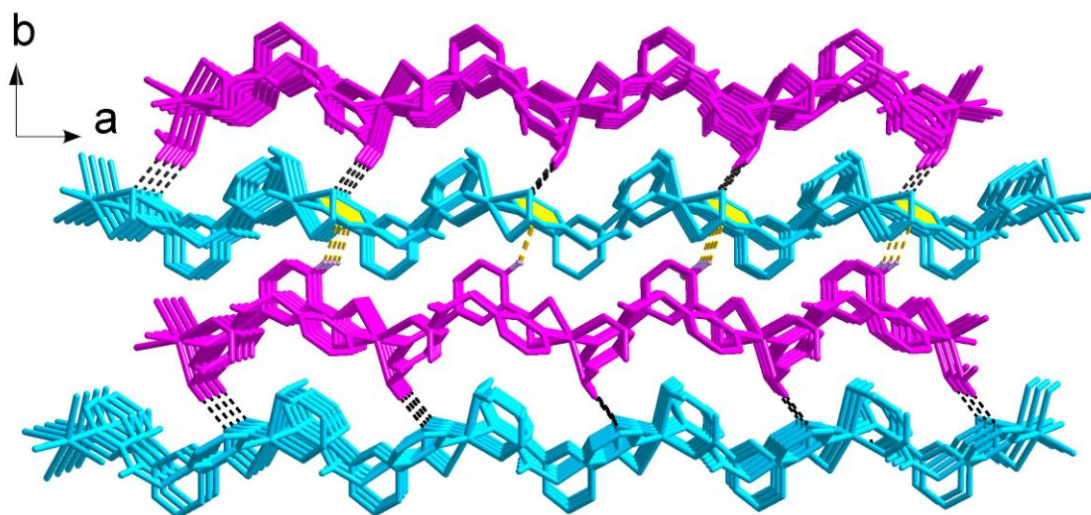

**Fig. S2** 3-D network extended by the C-H... $\pi$  interactions (yellow dashed lines).

Electronic Supplementary Information for CrystEngComm

This journal is (c) The Royal Society of Chemistry 2012

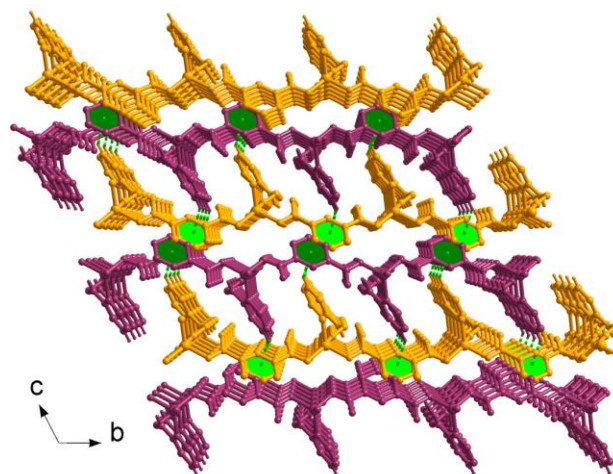

**Fig. S3** 3-D network linked by the interlayer C-H $\cdots$  $\pi$  interactions with adjacent sheets packed in an

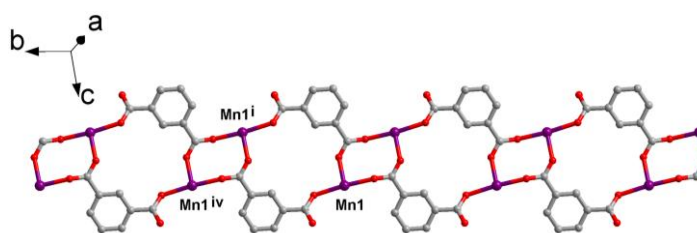

**Fig. S4** 1-D double chain along the [010] direction formed by the carboxyl groups linking Mn(II) cations.

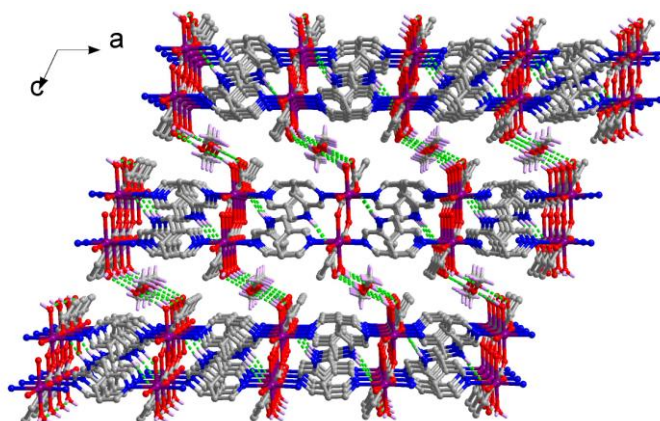

**Fig. S5** 3-D network linked by the interlayer O-H $\cdots$ O hydrogen bonds.

Electronic Supplementary Information for CrystEngComm

This journal is (c) The Royal Society of Chemistry 2012

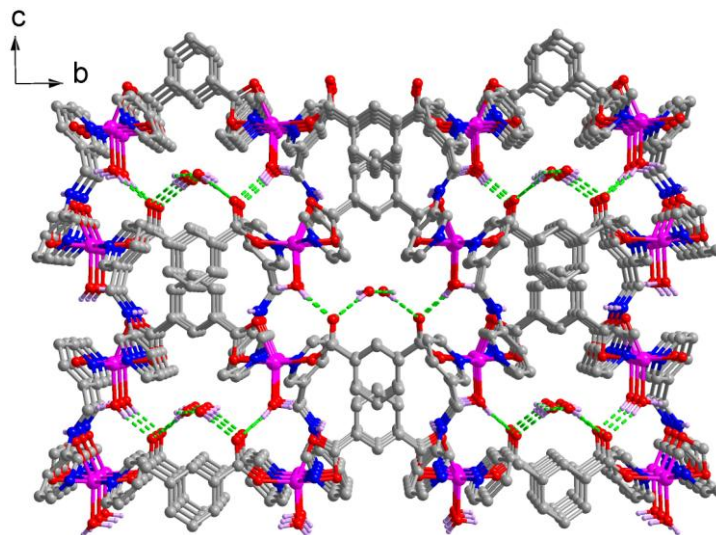

**Fig. S6** The 3-D network of complex **6** along the [100] direction with the

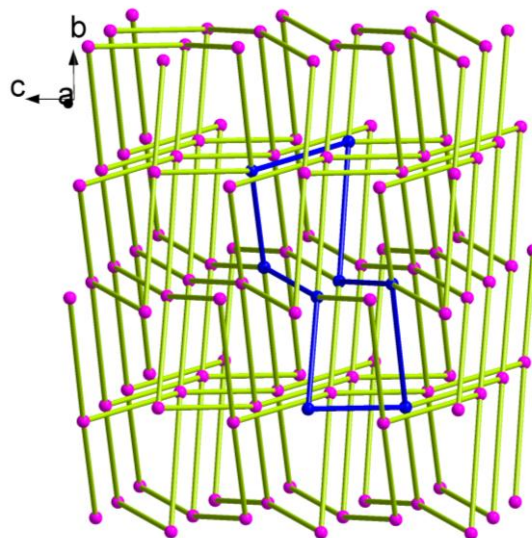

**Fig. S7** Schematic illustrating of the **tcb** topology of complex **6** with the shortest six-membered rings denoted as blue lines and balls.

Electronic Supplementary Information for CrystEngComm

This journal is (c) The Royal Society of Chemistry 2012

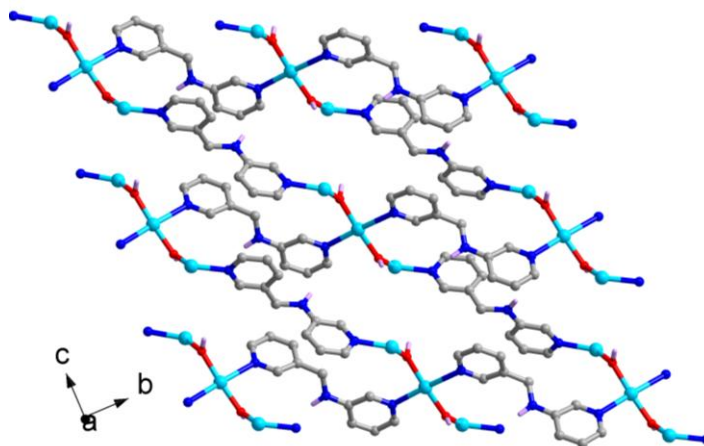

**Fig. S8** 2-D Layer motif in complex **8** formed by the **L2** molecules linking  $[Zn_3(OH)_2]$  clusters.

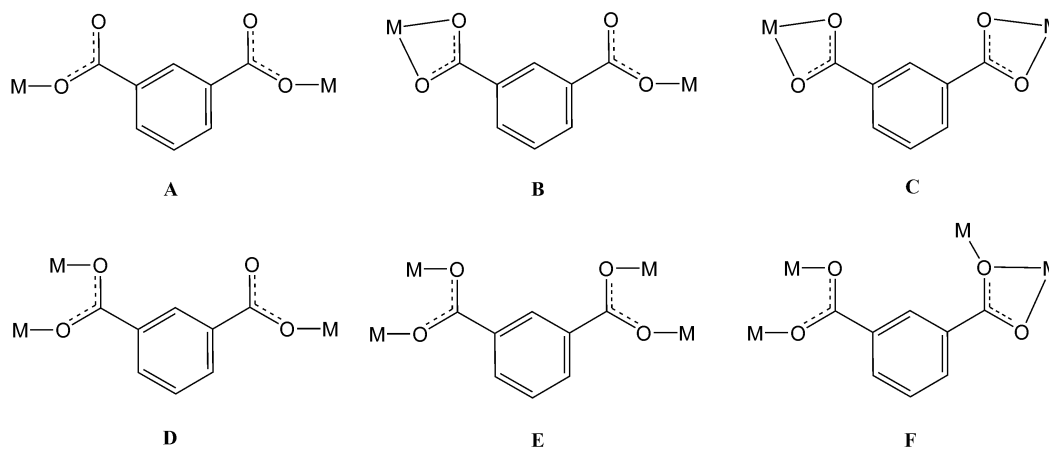

**Scheme S1** Coordination modes of ip dianions in the eight complexes.

**PXRD Analysis.** Powder X-ray diffraction (PXRD) patterns for solid samples of complexes **1-8** are measured at room temperature as illustrated in Fig. S9. The patterns are highly similar to their simulated ones (based on the single-crystal X-ray diffraction data), indicating that the single-crystal structures are really representative of the bulk of the corresponding samples.

Electronic Supplementary Information for CrystEngComm

This journal is (c) The Royal Society of Chemistry 2012

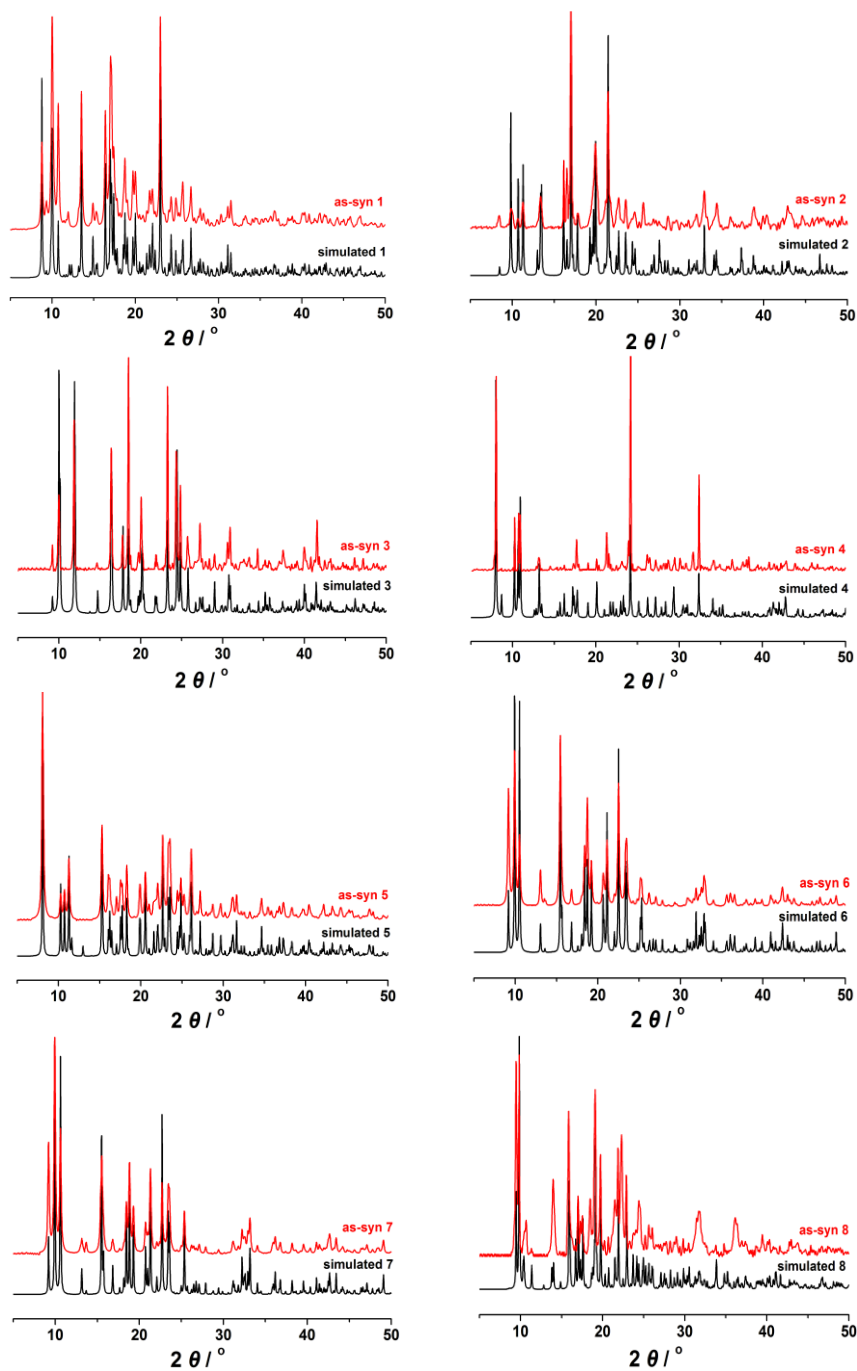

Fig. S9 PXRD patterns for complexes 1-8.

Electronic Supplementary Information for CrystEngComm

This journal is (c) The Royal Society of Chemistry 2012

### Thermogravimetric analysis

To examine the thermal stability of the complexes, in this study, their stabilities were analyzed on crystalline samples by thermogravimetric analyses (TGA) from room temperature to 900 °C at a rate of 10 °C min<sup>-1</sup>, under N<sub>2</sub> atmosphere. As shown in Fig. S10, the TGA curve indicates that complex **1** loses the lattice and coordinated water molecules from 50 to 157 °C with the observed weight loss of 8.24% (calcd 8.18%). The following gradually weight losses correspond to the loss of the organic components occurs in the temperature range 265-870 °C. The remaining component corresponds to Mn<sub>2</sub>O<sub>3</sub> (obsd 17.64%, calcd 17.93%). The weight loss corresponding to the release of the coordinated water molecules is observed from 70 to 180 °C (obsd 4.01%, calcd 4.23%) in complex **2**. The following weight loss completes at 468 °C, leading to the formation of CoO as the residue (obsd 17.21%, calcd 17.58%). Complex **3** exhibits nearly one step loss with the decomposing of organic components occurring in the temperature range 230-650 °C, and the final remaining component is ZnO (obsd 19.82%, calcd 19.62%). The decomposing of organic components in complex **4** occurs between 304 and 730 °C with the remaining component being CdO (obsd 34.58%, calcd 34.79%). Complex **5** loses the free methanol and coordinated water molecules from 54 to 185 °C with the observed weight loss of 11.14% (calcd 11.02%). Then, the following weight loss with the decomposing of organic components occurs in the temperature range 348-864 °C, and the final remaining component is Mn<sub>2</sub>O<sub>3</sub> (obsd 17.16%, calcd 17.37%). Complexes **6** and **7** exhibit the similar loss steps. The first step corresponds to the loss of lattice and coordinated water molecules in the temperature range 58-192 °C for **6** and 58-192 °C for **7** (obsd 8.01% for **6** and 8.08% for **7**, calcd 8.11% for **6** and **7**). Then, the following weight loss with the decomposing of organic components occurs in the temperature range 360-464 °C (complex **6**) and 380-473 °C (complex **7**), and the final remaining component corresponds to CoO (obsd 16.63%, calcd 16.86%) and NiO (obsd 17.06%, calcd 16.82%), respectively. Complex **8** also exhibits nearly one step loss with the decomposing of organic components occurring in the temperature range 202-524 °C, and the final remaining component is ZnO (obsd 26.37%, calcd 26.29%).

Electronic Supplementary Information for CrystEngComm

This journal is (c) The Royal Society of Chemistry 2012

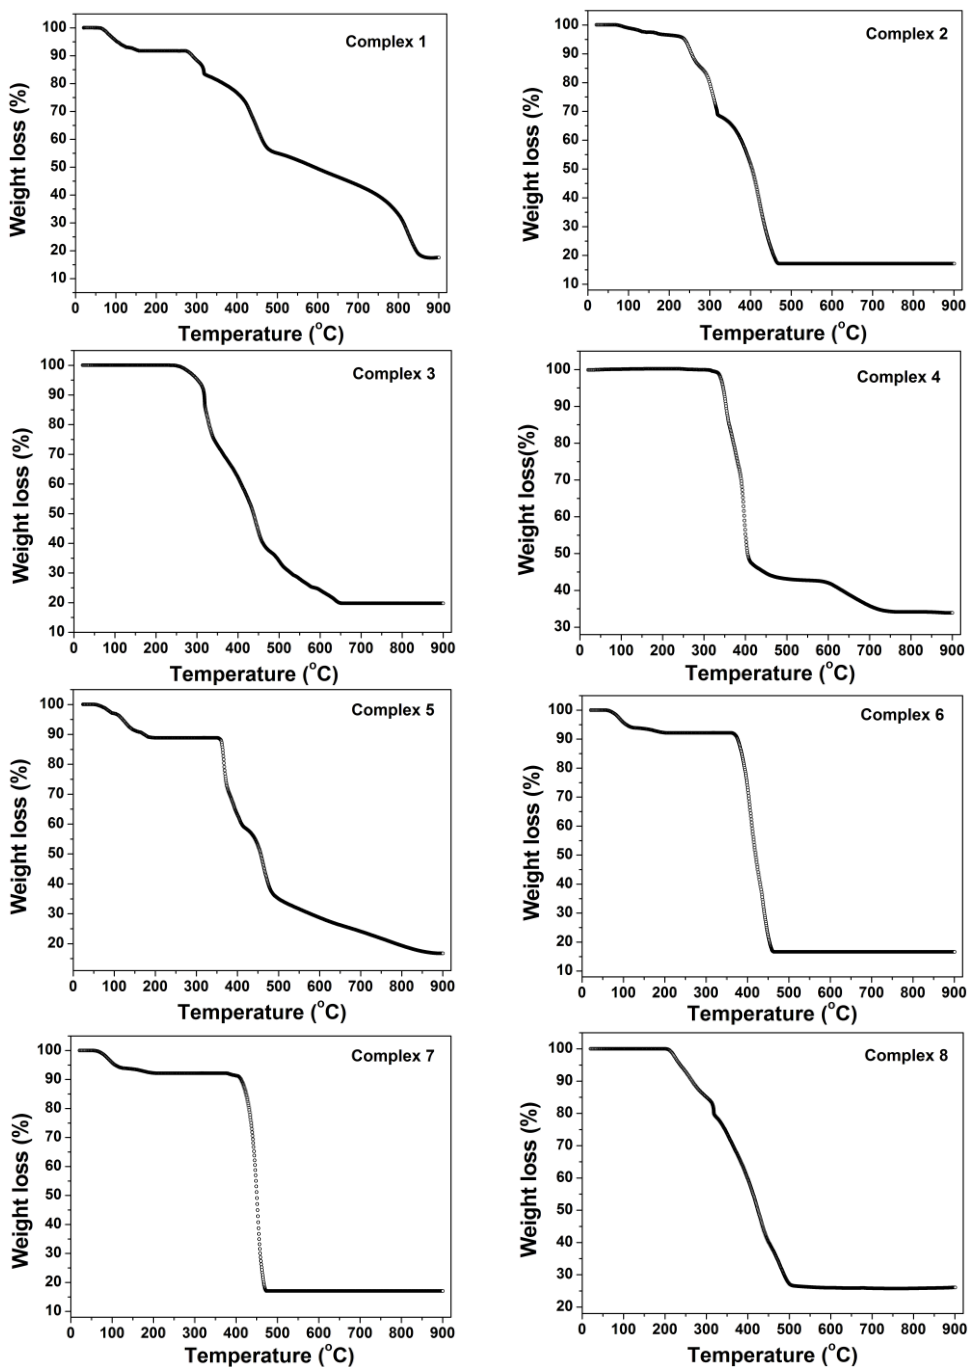

Fig. S10 TG curves of complexes 1-8.



Electronic Supplementary Information for CrystEngComm

This journal is (c) The Royal Society of Chemistry 2012

**Table S1** Selected bond lengths (Å) data of complexes **1-8<sup>a</sup>**

| <b>Complex 1</b>         |            |                           |          |
|--------------------------|------------|---------------------------|----------|
| Mn(1)-O(1)               | 2.127(5)   | Mn(2)-O(5)                | 2.119(5) |
| Mn(1)-O(2W)              | 2.160(5)   | Mn(2)-O(3W)               | 2.123(5) |
| Mn(1)-O(1W)              | 2.196(4)   | Mn(2)-N(3)                | 2.204(6) |
| Mn(1)-O(4) <sup>i</sup>  | 2.269(5)   | Mn(2)-O(8) <sup>ii</sup>  | 2.240(5) |
| Mn(1)-N(1)               | 2.273(7)   | Mn(2)-N(4)                | 2.269(6) |
| Mn(1)-O(3) <sup>i</sup>  | 2.324(5)   | Mn(2)-O(7) <sup>ii</sup>  | 2.325(5) |
| <b>Complex 2</b>         |            |                           |          |
| Co(1)-O(3) <sup>i</sup>  | 2.089(6)   | Co(2)-O(8) <sup>i</sup>   | 2.044(6) |
| Co(1)-O(1W)              | 2.087(6)   | Co(2)-O(2W)               | 2.081(8) |
| Co(1)-O(1)               | 2.130(6)   | Co(2)-O(6)                | 2.111(6) |
| Co(1)-O(2)               | 2.166(6)   | Co(2)-N(4)                | 2.199(8) |
| Co(1)-N(3) <sup>ii</sup> | 2.186(8)   | Co(2)-N(6) <sup>ii</sup>  | 2.200(7) |
| Co(1)-N(1)               | 2.240(7)   | Co(2)-O(5)                | 2.208(6) |
| <b>Complex 3</b>         |            |                           |          |
| Zn(1)-O(3) <sup>i</sup>  | 1.983(2)   | Zn(1)-N(3) <sup>ii</sup>  | 2.010(2) |
| Zn(1)-O(1)               | 1.9882(19) | Zn(1)-N(1)                | 2.054(2) |
| <b>Complex 4</b>         |            |                           |          |
| Cd(1)-O(1)               | 2.240(3)   | Cd(2)-O(6)                | 2.234(3) |
| Cd(1)-O(3) <sup>i</sup>  | 2.248(3)   | Cd(2)-O(8) <sup>i</sup>   | 2.254(3) |
| Cd(1)-O(5)               | 2.317(3)   | Cd(2)-O(4) <sup>iii</sup> | 2.307(3) |
| Cd(1)-O(7) <sup>ii</sup> | 2.342(3)   | Cd(2)-O(2)                | 2.316(3) |
| Cd(1)-N(1)               | 2.405(4)   | Cd(2)-N(3) <sup>iv</sup>  | 2.360(4) |
| Cd(1)-O(4) <sup>i</sup>  | 2.540(3)   | Cd(2)-O(7) <sup>i</sup>   | 2.583(3) |
| <b>Complex 5</b>         |            |                           |          |
| Mn(1)-O(4) <sup>i</sup>  | 2.129(2)   | Mn(1)-N(1)                | 2.244(3) |
| Mn(1)-O(3) <sup>ii</sup> | 2.146(2)   | Mn(1)-O(1)                | 2.262(2) |
| Mn(1)-O(1W)              | 2.214(2)   | Mn(1)-N(3) <sup>iii</sup> | 2.277(3) |
| <b>Complex 6</b>         |            |                           |          |
| Co(1)-O(3)               | 1.995(2)   | Co(1)-O(2)                | 2.155(2) |
| Co(1)-O(1W)              | 2.026(3)   | Co(1)-N(1)                | 2.167(3) |

|                         |                       |                           |          |
|-------------------------|-----------------------|---------------------------|----------|
| Co(1)-N(3) <sup>i</sup> | 2.134(3)              | Co(1)-O(1)                | 2.201(3) |
| <b>Complex 7</b>        |                       |                           |          |
| Ni(1)-O(3)              | 1.987(3)              | Ni(1)-N(3) <sup>i</sup>   | 2.112(3) |
| Ni(1)-O(1W)             | 2.019(4)              | Ni(1)-O(2)                | 2.149(2) |
| Ni(1)-N(1)              | 2.145(3)              | Ni(1)-O(1)                | 2.195(3) |
| <b>Complex 8</b>        |                       |                           |          |
| Zn(1)-O(9)              | 1.873(4)              | Zn(2)-O(2)                | 2.128(4) |
| Zn(1)-O(5)              | 1.966(4)              | Zn(2)-N(4)                | 2.318(5) |
| Zn(1)-O(1)              | 1.996(4)              | Zn(2)-N(6) <sup>i</sup>   | 2.517(6) |
| Zn(1)-N(1)              | 2.062(5)              | Zn(3)-O(10)               | 1.873(4) |
| Zn(1)-O(6)              | 2.728(5) <sup>b</sup> | Zn(3)-O(3) <sup>ii</sup>  | 1.956(4) |
| Zn(2)-O(9)              | 1.976(4)              | Zn(3)-O(8)                | 1.981(4) |
| Zn(2)-O(10)             | 1.987(4)              | Zn(3)-N(3) <sup>iii</sup> | 2.082(5) |
| Zn(2)-O(7)              | 2.119(4)              |                           |          |

<sup>a</sup> Symmetry operations: **For 1**, i x+1,y,z; ii x-1,y,z. **For 2**, i x-1,y,z-1; ii x+1,y,z. **For 3**, i x,y+1,z; ii x+1,y,z. **For 4**, i x+1/2,-y+1/2,z+1/2; ii -x+1,-y,-z+1; iii -x+1,-y+1,-z+1; iv x+1,y,z. **For 5**, i -x+1,-y+1,-z; ii x,y-1,z; iii x+1,y+1,z. **For 6**, i x-1,-y+3/2,z-1/2. **For 7**, i x-1,-y+3/2,z-1/2. **For 8**, i -x+3/2,y+1/2,z-1/2; ii x+1/2,-y+3/2,z+1/2; iii -x+3/2,y-1/2,z+3/2.

<sup>b</sup> Zn(1)-O(6) is a longer contact, which also has been indicated in the main text.

---

Electronic Supplementary Information for CrystEngComm

This journal is (c) The Royal Society of Chemistry 2012

**Table 2** Hydrogen bond parameters for complexes **1-8**<sup>a</sup>

| D-H...A                            | d(D-H)    | d(H...A)  | d(D...A)  | <(DHA) |
|------------------------------------|-----------|-----------|-----------|--------|
| <b>Complex 1</b>                   |           |           |           |        |
| O(1W)-H(1W1)...O(8) <sup>iii</sup> | 0.82      | 2.09      | 2.838(6)  | 152.1  |
| O(1W)-H(1W2)...O(5) <sup>iv</sup>  | 0.82      | 2.00      | 2.744(7)  | 151.5  |
| O(2W)-H(2W1)...O(7) <sup>v</sup>   | 0.82      | 2.24      | 3.047(6)  | 169.4  |
| O(2W)-H(2W2)...N(6) <sup>vi</sup>  | 0.82      | 1.94      | 2.750(8)  | 168.9  |
| O(3W)-H(3W1)...O(2) <sup>vii</sup> | 0.82      | 1.92      | 2.736(7)  | 178.7  |
| O(3W)-H(3W2)...O(4W)               | 0.82      | 1.86      | 2.684(7)  | 177.3  |
| O(4W)-H(4W1)...O(4) <sup>vii</sup> | 0.82      | 1.84      | 2.661(7)  | 177.9  |
| O(4W)-H(4W2)...O(6)                | 0.82      | 1.89      | 2.711(8)  | 177.9  |
| N(2)-H(2N)...O(1)                  | 0.86(9)   | 2.12(9)   | 2.976(9)  | 175(8) |
| N(5)-H(5N)...O(6) <sup>viii</sup>  | 0.86(9)   | 2.50(5)   | 3.245(10) | 145(7) |
| O(1W)-H(1W1)...O(8) <sup>iii</sup> | 0.82      | 2.09      | 2.838(6)  | 152.1  |
| <b>Complex 2</b>                   |           |           |           |        |
| O(1W)-H(1W1)...O(4) <sup>i</sup>   | 0.82      | 1.84      | 2.661(8)  | 174.1  |
| O(1W)-H(1W1)...O(3) <sup>i</sup>   | 0.82      | 2.49      | 3.022(9)  | 123.6  |
| O(1W)-H(1W2)...O(5) <sup>iv</sup>  | 0.82      | 2.00      | 2.818(9)  | 174.4  |
| O(2W)-H(2W1)...O(7) <sup>i</sup>   | 0.85(5)   | 1.82(4)   | 2.629(9)  | 157(9) |
| O(2W)-H(2W2)...N(4)                | 0.85(5)   | 2.61(10)  | 3.010(10) | 110(8) |
| N(2)-H(2N)...O(3) <sup>i</sup>     | 0.86      | 2.11      | 2.897(11) | 152.6  |
| N(5)-H(5N)...O(8) <sup>i</sup>     | 0.86      | 2.11      | 2.873(11) | 147.8  |
| <b>Complex 3</b>                   |           |           |           |        |
| N(2)-H(2N)...O(1)                  | 0.854(10) | 2.170(12) | 3.011(3)  | 168(3) |
| <b>Complex 4</b>                   |           |           |           |        |
| N(2)-H(2N)...O(7) <sup>ii</sup>    | 0.86      | 2.23      | 3.075(6)  | 168.2  |
| <b>Complex 5</b>                   |           |           |           |        |
| N(2)-H(2N)...O(1) <sup>vi</sup>    | 0.86(4)   | 2.340(16) | 3.172(4)  | 162(3) |
| O(1W)-H(1W1)...O(2)                | 0.85(3)   | 1.766(13) | 2.599(3)  | 166(4) |
| O(1W)-H(1W2)...O(5) <sup>vii</sup> | 0.86(4)   | 1.941(12) | 2.790(4)  | 173(4) |

|                                                                                                                                                                                                                                                                                                                                                                                                                         |         |           |           |        |
|-------------------------------------------------------------------------------------------------------------------------------------------------------------------------------------------------------------------------------------------------------------------------------------------------------------------------------------------------------------------------------------------------------------------------|---------|-----------|-----------|--------|
| O(5)-H(5O)...O(2) <sup>viii</sup>                                                                                                                                                                                                                                                                                                                                                                                       | 0.86(5) | 2.052(12) | 2.906(5)  | 176(6) |
| <b>Complex 6</b>                                                                                                                                                                                                                                                                                                                                                                                                        |         |           |           |        |
| O(1W)-H(1W2)...O(1) <sup>v</sup>                                                                                                                                                                                                                                                                                                                                                                                        | 0.85(4) | 2.07(6)   | 2.643(4)  | 124(5) |
| O(1W)-H(1W1)...O(4) <sup>v</sup>                                                                                                                                                                                                                                                                                                                                                                                        | 0.85(4) | 1.83(4)   | 2.653(4)  | 162(5) |
| O(2W)-H(2W2)...O(2)                                                                                                                                                                                                                                                                                                                                                                                                     | 0.85    | 2.16      | 2.994(9)  | 169.1  |
| O(2W)-H(2W1)...O(4) <sup>v</sup>                                                                                                                                                                                                                                                                                                                                                                                        | 0.85    | 2.19      | 3.031(9)  | 169.1  |
| <b>Complex 7</b>                                                                                                                                                                                                                                                                                                                                                                                                        |         |           |           |        |
| O(1W)-H(1W1)...O(1) <sup>v</sup>                                                                                                                                                                                                                                                                                                                                                                                        | 0.85    | 1.79      | 2.639(4)  | 173.4  |
| O(1W)-H(1W2)...O(4) <sup>v</sup>                                                                                                                                                                                                                                                                                                                                                                                        | 0.85    | 1.79      | 2.640(5)  | 173.1  |
| O(2W)-H(2W1)...O(2)                                                                                                                                                                                                                                                                                                                                                                                                     | 0.85    | 2.14      | 2.977(9)  | 169.2  |
| O(2W)-H(2W2)...O(4) <sup>v</sup>                                                                                                                                                                                                                                                                                                                                                                                        | 0.85    | 2.17      | 3.006(10) | 169.3  |
| <b>Complex 8</b>                                                                                                                                                                                                                                                                                                                                                                                                        |         |           |           |        |
| O(9)-H(9O)...O(4) <sup>ix</sup>                                                                                                                                                                                                                                                                                                                                                                                         | 0.85(4) | 2.06(4)   | 2.826(6)  | 150(6) |
| O(10)-H(10O)...O(6) <sup>x</sup>                                                                                                                                                                                                                                                                                                                                                                                        | 0.85(4) | 2.08(3)   | 2.858(6)  | 152(6) |
| <sup>a</sup> Symmetry operations: <b>For 1</b> , iii -x+2,-y+1,-z+1; iv -x+1,-y+1,-z+1; v -x+2,-y,-z+1; vi x+1,y-1,z-1; vii -x+1,-y,-z+1; viii -x+1,-y+1,-z+2. <b>For 2</b> , i x-1,y,z-1; iv x-1,y,z. <b>For 4</b> , ii -x+1,-y,-z+1. <b>For 5</b> , vi -x,-y,-z; vii x+1,y,z; viii -x+1,-y+1,-z+1. <b>For 6</b> , v x,-y+3/2,z+1/2. <b>For 7</b> , v x,-y+3/2,z+1/2. <b>For 8</b> , ix x+1/2,-y+3/2,z-1/2; x x,y,z+1. |         |           |           |        |
